1 A-to-I mRNA editing in a ferric siderophore receptor improves competition for  
2 iron in *Xanthomonas oryzae*

3 Wenhan Nie <sup>1\*</sup>, Sai Wang <sup>1\*</sup>, Jin Huang <sup>1</sup>, Qin Xu <sup>2</sup>, Peihong Wang <sup>1</sup>, Yan Wu <sup>1</sup>,

4 Ayizekeranmu Yiming <sup>1</sup>, Iftikhar Ahmad <sup>1,3</sup>, Bo Zhu <sup>1§</sup>, Gongyou Chen <sup>1§</sup>

5 <sup>1</sup> Shanghai Yangtze River Delta Eco-Environmental Change and Management Observation  
6 and Research Station, Ministry of Science and Technology, Ministry of Education, Shanghai  
7 Urban Forest Ecosystem Research Station, National Forestry and Grassland Administration,  
8 Shanghai Cooperative Innovation Center for Modern Seed Industry, School of Agriculture  
9 and Biology, Shanghai Jiao Tong University, China

10 <sup>2</sup> State Key Laboratory of Microbial Metabolism, and SJTU-Yale Joint Center for  
11 Biostatistics and Data Science, School of Life Sciences and Biotechnology, Shanghai Jiao  
12 Tong University, Shanghai 200240, China

13 <sup>3</sup> Department of Environmental Sciences, COMSATS University Islamabad, Vehari-Campus,  
14 Vehari-61100, Pakistan

15 \* These authors contributed equally

16 §To whom correspondence should be addressed: [gyouchen@sjtu.edu.cn](mailto:gyouchen@sjtu.edu.cn) or

17 [bzhu1981@sjtu.edu.cn](mailto:bzhu1981@sjtu.edu.cn)

18 Running Title: A-to-I editing improves competition for iron

19

20 **ABSTRACT**

21 Adenosine-to-inosine (A-to-I) RNA editing, which is catalyzed by the adenosine  
22 deaminase RNA-specific family of enzymes, is a frequent post-transcriptional modification in

1 metazoans. Research on A-to-I editing in bacteria is limited, and the importance is  
2 underestimated. In this study, we show that bacteria may use A-to-I editing as an alternative  
3 strategy to promote uptake of metabolic iron. The T408A editing event of *xfeA* in  
4 *Xanthomonas oryzae* pv. *oryzicola* (*Xoc*) senses extracytoplasmic iron and changes the  
5 hydrogen bonding network of ligand channel domains. The frequency of A-to-I RNA editing  
6 during iron-deficient conditions increased by 76.87%, which facilitated the passage of iron  
7 through the XfeA outer membrane channel. When bacteria were subjected to high iron  
8 concentrations, the percentage of A-to-I editing in *xfeA* decreased, which reduced iron  
9 transport via XfeA. Furthermore, A-to-I RNA editing increased expression of multiple genes  
10 in the chemotaxis pathway, including methyl-accepting chemotaxis proteins (MCPs) that  
11 sense concentrations of exogenous ferric enterobactin (Fe-Ent) at the cytoplasmic membrane.  
12 A-to-I RNA editing helps *Xoc* move towards an iron-rich environment and supports our  
13 contention that editing in *xfeA* facilitates entry of a ferric siderophore. Overall, our results  
14 reveal a new signaling mechanism that bacteria use to facilitate iron uptake and improve their  
15 competitiveness.

16

## 17 **INTRODUCTION**

18 Iron is one of the most abundant elements in the Earth's crust and is essential for all life  
19 forms due to its roles in respiration, photosynthesis, DNA replication, oxygen transport and  
20 protection from various stresses (Skaar, 2010; L. Wang et al., 2016). Bacterial pathogens  
21 acquire iron within the host to promote survival and replication. The ability to successfully  
22 compete for iron is critical for bacterial pathogens that invade hosts when iron is limiting,

1 which is a form of nutritional immunity (Hood & Skaar, 2012). Animal and plant hosts can  
2 retain iron by sequestering the element with various proteins or low molecular weight  
3 compounds (Fischbach, Lin, Liu, & Walsh, 2006; Kehl-Fie & Skaar, 2010), whereas bacteria  
4 have developed efficient iron uptake mechanisms based on high-affinity siderophores (Hider  
5 & Kong, 2010; Raines et al., 2016).

6 Many gram-negative bacteria such as *Xanthomonas* utilize siderophores to scavenge iron  
7 (Ryan et al., 2011). Siderophores are generally synthesized within the bacterial cell and then  
8 secreted to the extracellular milieu where they capture  $Fe^{3+}$ . The resulting ferric siderophore  
9 complex is recognized at the outer membrane by TonB-dependent receptors (TBDR) and then  
10 actively transported into the periplasm of gram-negative species (Schalk, Mislin, & Brillet,  
11 2012). One of the most well-characterized TBDRs is FepA, which transports the siderophore  
12 enterobactin (Ent) into the *Escherichia coli* periplasm. In the periplasm, ferrienterobactin  
13 (Fe-Ent) is sequestered by the periplasmic binding protein FepB, which transfers Fe-Ent to  
14 the inner membrane for further transport into the cytoplasm via FepCD (Raines et al., 2016).  
15 In the cytoplasm, Fe-Ent is hydrolyzed to release  $Fe^{3+}$  and converted to  $Fe^{2+}$  for further usage  
16 in the cell (Raymond, Dertz, & Kim, 2003).

17 RNA editing involves the alteration of ribonucleic acid after the molecule is produced by  
18 RNA polymerase and may involve deletion, insertion or base substitution events. One of the  
19 more common RNA editing events is the deamination of adenosine to inosine (A-to-I), which  
20 is catalyzed by the dsRNA-specific adenosine deaminase (ADAR) family of enzymes  
21 (Yablonovitch, Deng, Jacobson, & Li, 2017). The conversion of adenosine to inosine  
22 destabilizes dsRNA base pairing, interferes with the RNAi pathway and can change the

1 amino acid sequence of the resulting protein. Post-transcriptional A-to-I editing has proven  
2 important in eukaryotes where it can drive adaptive evolution of the host (Yablonovitch et al.,  
3 2017); however, little is known about the incidence and function of A-to-I RNA editing in  
4 bacteria (Bar-Yaacov et al., 2017).

5 Our lab is interested in the role of A-to-I RNA editing in *Xanthomonas oryzae* pv.  
6 *oryzicola* (*Xoc*), which causes bacterial leaf streak in rice. We previously identified an A-to-I  
7 mRNA editing event in *Xoc* designated T408A (Nie et al., 2020); this editing event changed  
8 threonine to alanine in residue 408 of a ferric siderophore outer membrane receptor (FepA  
9 orthologue). In this study, the role of the T408A editing event was explored in *xfeA*, the *Xoc*  
10 homolog of *fepA*. The results show that the T408A editing event in *xfeA* enhances bacterial  
11 iron uptake capacity and improves tolerance to iron-limiting conditions.

## 12 RESULTS

13 **T408A editing in *xfeA* is dependent on iron concentrations.** Editing in *xfeA* was  
14 analyzed in cDNA samples of *Xoc* BLS256 grown in media amended with the iron chelating  
15 agent 2,2'-dipyridyl (DP) or supplemented with FeCl<sub>3</sub> (Fig. 1a). The results suggested that  
16 T408A editing was dependent on available iron, and the incidence of editing was higher as  
17 the concentration of DP increased and iron became limiting (Fig. 1a). When *Xoc* BLS256 was  
18 cultured in non-amended NB, only 21.27% of the cDNAs contained the A-to-I editing event  
19 (A→G, Fig. 1b). Similarly, very low levels of editing (1.06%) were observed in BLS256  
20 grown in NB plus 100 μM FeCl<sub>3</sub> (Fig. 1a). In samples subjected to iron chelation, 37.39%,  
21 76.87% and 78.03% of the cDNA samples exhibited A→G editing in the presence of 50, 100  
22 and 150 μM DP, respectively (Fig. 1a,b). To block RNA editing, the synonymous mutation

1 (ACG → ACA) was generated in the *Xoc* mutant T408<sup>silent</sup>, and no editing was detected in  
2 *xfeA* (Fig. 1b, red arrow).

3 Editing was also compared by RNA-seq analysis of the T408A (contains A→G point  
4 mutation) and T408<sup>silent</sup> strains grown in NB medium and analyzed with AIMAP (A-to-I  
5 modification analysis pipeline) (S. Wang et al., 2020). The results indicated that *xfeA* editing  
6 was 100% and 0% in the T408A and T408<sup>silent</sup> mutants, respectively (Table S4). These results  
7 confirmed that A-to-I RNA editing in *xfeA* was blocked in the T408<sup>silent</sup> mutant and  
8 emphasized the importance of the editing motif. A-to-I editing in *xfeA* occurred at low levels  
9 in the  $\Delta tadA$  mutant (Fig. 1a), indicating that editing was not dependent on *tadA*-encoded  
10 adenosine deaminase activity; this was surprising since the TACG motif and the RNA  
11 secondary structure of *xfeA* contains motifs and structures recognized by TadA (Bar-Yaacov  
12 et al., 2017) (Fig. 1b, S2).

13 **T408A mutants show increased tolerance to iron depletion.** Growth of the *Xoc* BL256  
14 (WT), T408A, and T408<sup>silent</sup> strains were compared in 0, 50, 100 and 150  $\mu$ M DP (Fig. 2a-d).  
15 Strains grown in NB medium with or without 50  $\mu$ M DP showed similar growth patterns (Fig.  
16 2a and 2b); however, a longer lag phase and reduced growth rate were observed in WT and  
17 T408<sup>silent</sup> strains grown in NB supplemented with 100 or 150  $\mu$ M DP (Fig. 2c and 2d). The  
18 T408A strain (fixed, 100% editing) showed enhanced tolerance to DP and better growth than  
19 the WT and T408<sup>silent</sup>; the latter strain was severely impaired in growth at 150  $\mu$ M DP due to  
20 lack of editing. The results indicate that T408A editing helps *Xoc* adapt to iron-deficient  
21 conditions.

22 **T408A editing enhances iron uptake.** Intracellular iron concentrations were measured

1 in the T408A, T408<sup>silent</sup> and WT strains by inductively coupled plasma optical emission  
2 spectrometry (ICP-OES). In iron-deficient conditions (NB medium + 50  $\mu$ M DP), iron  
3 accumulation in *Xoc* T408A and WT cells strains was significantly higher than that in cells of  
4 the T408<sup>silent</sup> strain (Fig. 2e). In non-amended NB, iron concentrations in the T408A and WT  
5 strains increased by 175.3% and 110.1%, respectively, as compared to the T408<sup>silent</sup> strain. In  
6 iron-replete conditions (NB + 100  $\mu$ M FeCl<sub>3</sub>), the iron content of T408A and WT cells was  
7 145.6 and 23.6% higher than T408<sup>silent</sup>, respectively (Fig. 2e). These results suggest that the  
8 T408A strain has better iron uptake than the WT and T408<sup>silent</sup> strains in the presence of  
9 supplemental iron, which further confirms the importance of T408A RNA editing in *xfеA*.

10 Streptonigrin (SNG) is an antibiotic that requires iron for antibacterial activity, and its  
11 toxicity is correlated with intracellular iron concentrations (Yeowell & White, 1982). To  
12 further characterize the relationship between T408A editing and iron uptake, *Xoc* resistance to  
13 SNG was measured. When *Xoc* strains were exposed to 1  $\mu$ g/mL SNG, survival of T408A and  
14 the WT were 69.8 and 23.2% lower than T408<sup>silent</sup> strain, respectively. When the three strains  
15 were grown in iron-deficient conditions (NB + 50  $\mu$ M DP), survival in response to SNG was  
16 improved and could be ranked as follows: T408A < WT < T408<sup>silent</sup> (Fig. 2f). Collectively,  
17 these results supported our contention that *xfеA* T408A editing event facilitates iron uptake  
18 and increases tolerance to iron deficient conditions.

19 **T408A editing upregulates genes related to chemotaxis.** RNA-seq was used to analyze  
20 expression in the T408A and T408<sup>silent</sup> strains to further investigate the effect of *xfеA* T408A  
21 editing. The correlation coefficients (*r*) in two replicate experiments were 0.991 and 0.998,  
22 suggesting satisfactory reproducibility of RNA-seq data under the experimental conditions.

1 Based on the cutoff values described in Methods, 138 differentially expressed genes (DEGs)  
2 were identified (Fig. 3a, Table S3). KEGG analysis indicated that the chemotaxis pathway  
3 was enriched in these DEGs (Table. S3). Interestingly, 21 of 24 chemotaxis pathway genes  
4 were up-regulated at least 1.5-fold [false discovery rate (FDR) < 0.01]. The following five  
5 genes were selected to verify the RNA-seq data by qRT-PCR: *xoc\_2278* (encodes a  
6 two-component response regulatory protein similar to CheB); *xoc\_2280* (encodes a  
7 chemotaxis methyltransferase similar to CheR); and *xoc\_2289*, *xoc\_2291*, *xoc\_2297*, which  
8 are genes encoding methyl-accepting chemotaxis proteins (MCPs). *XfeA* was also included  
9 for comparative purposes. The results showed that expression levels of the five chemotaxis  
10 genes were correlated with iron concentration; in other words, expression was highest when  
11 NB was supplemented with 100  $\mu$ M FeCl<sub>3</sub> and lowest when the iron chelator DP was added  
12 to media (Fig. 3b). Expression of *xfeA* was relatively constant and was not impacted by iron  
13 levels (Fig. 3b; Fig. S1), and transcription of the chemotaxis genes was generally higher in  
14 T408A as compared to T408<sup>silent</sup> (Fig. 3b). A diagram of the chemotaxis pathway was  
15 modeled using KEGG map entry 02030 (<https://www.genome.jp/entry/map02030>) and used  
16 to illustrate the upregulated genes due to T408A editing. Interestingly, almost all genes in the  
17 chemotaxis pathway were upregulated (Fig. 3c), which suggested that the T408A editing  
18 event may induce sensitivity to one or more chemoattractants.

19 A capillary assay was performed to determine the chemotaxis of T408A, T408<sup>silent</sup> and  
20 WT strains towards glucose (2.0 mg/mL), serine (10 mg/mL), Fe-Ent (10  $\mu$ M and 100  $\mu$ M)  
21 and 0.01 M pH=7.0 PBS buffer (representing random diffusion). The chemotactic response  
22 relative to glucose was calculated for each strain. The T408A strain showed a significant

1 chemotactic response to 10 and 100  $\mu$ M Fe-Ent, whereas T408<sup>silent</sup> showed reduced sensitivity  
2 to Fe-Ent (Fig. 3d). There was no significant difference among strains in chemotaxis for  
3 serine.

4 Two MCPs, Xoc\_2282 and Xoc\_2291, were expressed and purified to determine  
5 whether they interact directly with FeCl<sub>3</sub> or Fe-Ent using the Octet RED system (ORS) (Fig.  
6 4a-d). The MCP/Fe-Ent association curves exceeded the 0 nm line (Fig. 4c, d), indicating that  
7 the MCPs interact directly with Fe-Ent. However, association curves of the MCP/FeCl<sub>3</sub>  
8 interaction fell below the 0 nm line, which indicates lack of binding between the MCPs and  
9 Fe<sup>3+</sup>. The Xoc\_2282/Fe-Ent and Xoc\_2291/Fe-Ent interactions were also evaluated with the  
10 Biacore 8K system (Fig. 4c,d). The results showed that the MCPs directly bind Fe-Ent (Fig.  
11 4c,d) with K<sub>D</sub> values ranging from 4-6  $\times 10^{-8}$  M (Table 1). Collectively, these results indicated  
12 that T408A editing can improve the chemotactic response of bacteria for Fe-Ent, and  
13 ultimately increase intracellular iron concentrations.

14 **T408A editing contributes to *Xoc* virulence.** Leaves of six-week-old susceptible rice cv.  
15 Yuanfengzao were inoculated with *Xoc* BL256 (WT) and the T408A and T408<sup>silent</sup> mutants  
16 (Fig. 5a). At 14 days post inoculation, lesions induced by the T408A mutant were 3.17 cm  
17 in length and significantly longer than lesions induced by the WT (2.33 cm) and T408<sup>silent</sup>  
18 (1.88) strains (Fig. 5b). *In planta* growth assays indicated that the T408A mutant multiplied  
19 to significantly higher levels than the WT and T408<sup>silent</sup> mutant (Fig. 5c). These results  
20 indicate that T408A editing enhances virulence in *Xoc*, possibly because of increased iron  
21 uptake.

22 **Homology modeling of XfeA in *Xoc* strains.** XfeA is an orthologue of FepA, the



1 ferrienterobactin outer membrane receptor protein (Buchanan et al., 1999). FepA functions in  
2 the entry of Fe-Ent into the cell, which is an important route of iron uptake in some  
3 gram-negative bacteria (Ma et al., 2007; Newton, Igo, Scott, & Klebba, 1999). Thus, we  
4 hypothesized that T408A editing could change the efficiency of ferric siderophore entry and  
5 iron uptake. To investigate this, the secondary structure and 3D homology model of XfeA  
6 were constructed based on the crystal structure of multiple TBDR templates, including over  
7 20 known 3D models of ferric siderophore receptors available at the Phyre2 web site (Kelley,  
8 Mezulis, Yates, Wass, & Sternberg, 2015). This approach enabled modeling of 797 residues  
9 (98%) at >90% confidence. Modeling revealed that XfeA is a 22-stranded transmembrane  
10  $\beta$ -barrel protein containing an N-terminal plug domain (Fig. 6a), a configuration that is  
11 conserved in other TBDRs (Ferguson & Deisenhofer, 2002). The Thr408 residue is located on  
12 the inner side of the barrel, and replacement with the Ala residue results in a truncated  
13  $\beta$ -strand (Fig. 6b, Fig. S5), thus changing the network of H bonds (Fig. 6c, 6d). Interestingly,  
14 the predicted binding region for Fe-Ent is positioned near the N-terminal plug, which is  
15 located away from the Thr408 residue (Moynié et al., 2019) (Fig. S6).

16

## 17 **DISCUSSION**

18 Most bacteria deal with excessive or deficient levels of iron via the ferric uptake  
19 regulator (Fur) (Hantke, 2001), an important cytoplasmic regulator of  $\text{Fe}^{2+}$  levels in bacteria  
20 (Hassan & Troxell, 2013). Fur-mediated regulation controls the expression of many genes,  
21 including some that encode virulence factors (McHugh et al., 2003). In the current study, we  
22 show that bacteria also use post-transcriptional A-to-I editing to regulate iron uptake. In

1 eukaryotes, A-to-I RNA editing functions in multiple regulatory processes, including splicing,  
2 microRNA targeting/processing and mRNA stability (Schaffer et al., 2020); however, A-to-I  
3 editing has only recently been described in bacteria (Bar-Yaacov et al., 2017; Nie et al., 2020;  
4 Safra et al., 2017).

5 In this study, *Xoc* responded to iron-limiting conditions by A-to-I RNA editing in *xfeA*. A  
6 mutant strain was generated with fixed A-to-I editing in *xfeA* and designated T408A. Strain  
7 T408A showed improved growth in iron-limiting conditions and a significant chemotactic  
8 response to ferrienterobactin. A-to-I RNA editing in *xfeA* also increased expression of  
9 multiple genes in the chemotaxis pathway, including two methyl-accepting chemotaxis  
10 proteins, *Xoc\_2282* and *Xoc\_2291*. Interestingly, both *Xoc\_2282* and *Xoc\_2291* interacted  
11 with Fe-Ent but not FeCl<sub>3</sub>. It is tempting to speculate that *XfeA* functions analogous to *FepA*,  
12 the ferrienterobactin outer membrane receptor protein that facilitates the transport of Fe-Ent  
13 into the cell (Ma et al., 2007; Newton et al., 1999).

14 MCPs are the predominant chemoreceptors in bacteria and regulate diverse cellular  
15 activities (Ud-Din & Roujeinikova, 2017). A typical MCP contains a domain that interacts  
16 directly with the ligand, which then transduces the signal to downstream genes (Milburn et al.,  
17 1991; Muok et al., 2019). In this study, MCPs *Xoc\_2282* and *Xoc\_2291* interacted with  
18 Fe-Ent, and binding kinetic constants were calculated. The interaction of MCPs with the  
19 ligand, Fe-Ent, was associated with increased activity of CheA and other chemotaxis-related  
20 genes (Fig. 3c, Table S3); this is consistent with activation of the chemotaxis signal  
21 transduction pathway. In *E. coli*, a MCP-CheW-CheA complex transduces signals to the  
22 response regulator CheY by phosphorylation (Wuichet & Zhulin, 2010). A similar

1 phenomenon might occur in *Xoc* and cause upregulation of additional chemotaxis genes in  
2 response to low iron availability and A-to-I editing in XfeA.

3       Although the MCPs *Xoc\_2282* and *Xoc\_2291* interacted with Fe-Ent, *Xoc* is not known  
4 to synthesize enterobactin as a siderophore. The predominant siderophore produced by  
5 *Xanthomonas* spp. is xanthoferrin, an  $\alpha$ -hydroxycarboxylate molecule that is known to be  
6 synthesized by *X. oryzae* (Pandey & Sonti, 2010). Interestingly, *Xoc* does contain several  
7 genes associated with enterobactin synthesis; e.g. *xoc\_2573* (phosphopantetheinyl transferase,  
8 EntD), *xoc\_2574* (Ent synthase subunit F) and *xoc\_2575* (ATP-dependent serine activating  
9 enzyme, EntF). Although these three genes were differentially expressed in the RNA-seq  
10 analysis of *Xoc* strains T408A and T408<sup>silent</sup> (differential expression data,  
11 <https://drive.google.com/file/d/1FTiS4tQpVsyHcSvJKk4NtZZludVntRxE/view?usp=sharing>),  
12 we were unable to conclusively demonstrate enterobactin synthesis in *Xoc*. It remains  
13 possible that *Xoc* synthesizes an enterobactin-like analogue; however, another possibility is  
14 that *Xoc* does not synthesize an Ent-like analogue, but instead retains the FepA-D proteins for  
15 exogenous ferrienterobactin uptake. For example, a recent study with *X. oryzae* pv. *oryzae*  
16 indicated that the pathogen produces several FecA and Ent-like receptors *in planta*, thus  
17 allowing the pathogen to acquire iron from heterologous ferric siderophores (González et al.,  
18 2012). In this respect, *X. oryzae* might resemble *Vibrio cholera* where siderophore piracy has  
19 been established (Byun, Jung, Chen, Valencia, & Zhu, 2020; Wyckoff, Allred, Raymond, &  
20 Payne, 2015).

21       The detection of iron concentrations by pathogenic bacteria is a critical factor in survival  
22 and establishment of a successful infection (L. Wang et al., 2016). The TonB complex

1 provides the energy required for active transport of ferric siderophores through  
2 TonB-dependent transporters (TBDTs) that are located in the outer membrane of  
3 gram-negative bacteria (Noinaj, Guillier, Barnard, & Buchanan, 2010). In *X. oryzae*, ferric  
4 enterobactin outer membrane receptors have been reported as potential virulence factors,  
5 partly due to their upregulation in rice (Carnielli, Artier, de Oliveira, & Novo-Mansur, 2017;  
6 González et al., 2012; Xu et al., 2015). In this study, we show that the *Xoc* T408A mutant is  
7 more virulent than the WT, and this is attributed to the fixed A-to-I editing in the  
8 TonB-dependent receptor *XfeA* and increased iron uptake. Our findings further support the  
9 importance of iron, siderophore uptake, and TonB-dependent receptors in the virulence of  
10 *Xanthomonas* spp. (Timilsina et al., 2020).

11 A curious finding in the present study was the TadA-independence of A-to-I editing in  
12 *xfeA*; this was unexpected due to the presence of motifs and structures in *xfeA* that would be  
13 recognized by TadA. There are reports indicating duplication of ancestral *tadA* in various  
14 bacteria (Torres et al., 2014); however, database searches for other *tadA* homologues in the  
15 BLS256 genome were unsuccessful. Since the A-to-I editing site in *xfeA* is largely unaffected  
16 in the *tadA* deletion mutant, we suggested that the unknown enzyme might be a specialized  
17 mRNA deaminase unlike TadA. The editing of mRNAs by adenosine deaminases acting on  
18 RNA (ADARs) is conserved in metazoans; however, recent work with filamentous fungi  
19 lacking ADAR orthologues has demonstrated that other mechanisms for A-to-I RNA editing  
20 exist (Bian, Ni, Xu, & Liu, 2019). It is also important to note that a new group of A-to-I RNA  
21 editing enzymes was recently described in *E. coli* and named restriction by an adenosine  
22 deaminase acting on RNA (RADAR) (Gao et al., 2020). Although we were unable to identify

1 obvious homologues for RADAR genes in *Xoc*, the discovery of this group of proteins further  
2 illustrates the capacity of bacteria to develop TadA-independent mechanisms for RNA  
3 editing.

4 Since both excessive and deficient levels of iron can be harmful, bacteria use global  
5 regulators such as Fur to detect iron and regulate the expression of genes involved in iron  
6 storage, uptake, and efflux (Bradley et al., 2020). Our study demonstrates that *Xoc* also uses  
7 A-to-I editing in *xfeA* to modulate iron acquisition via ferric siderophore transport across the  
8 outer membrane (Fig. 7). A-to-I editing in *xfeA* increases when iron is limiting and causes  
9 changes in the hydrogen-bonding network of XfeA; this facilitates transport of the ferric  
10 siderophore through the XfeA channel. A-to-I RNA editing in *xfeA* leads to increased  
11 expression of genes encoding MCPs, which interact with the ferric siderophore in the  
12 cytoplasmic membrane. Genes in the chemotaxis pathway are also induced as a result of  
13 A-to-I editing, and *Xoc* is chemotactically attracted to the ferric siderophore in the external  
14 milieu. When iron is plentiful, A-to-I editing in *xfeA* decreases, and less ferric siderophore  
15 traverses the XfeA channel of (Fig. 7).

16 In a recent study, we demonstrated that an A-to-I editing event in *fliC*, which encodes a  
17 flagella filament protein in *Xoc*, occurred in response to oxidative stress (Nie et al., 2020). It  
18 is important to note that *Xoc* is a seed-borne pathogen that is exposed to both oxidative stress  
19 and changing iron conditions in the host plant. The current study expands our knowledge of  
20 RNA editing in pathogenic bacteria and provides a mechanism for adapting to iron-deficient  
21 conditions. A-to-I RNA editing provides the bacterial cell a quick and rapid way to recode  
22 protein products that are appropriate for changes that occur during pathogenesis. It will be

1 interesting to see if other pathogens use a similar mechanism to adapt to fluctuations in iron  
2 levels.

3

#### 4 **MATERIALS AND METHODS**

5 **Bacterial strains, plasmids, plant materials, and reagents.** The bacterial strains and  
6 plasmids used in this study are described in Table S1. *Xoc* strain T408A is a derivative of  
7 BLS256 containing a mutation (TACG to TGCG) that changes the threonine at amino acid  
8 residue 408 in XfeA to alanine. T408<sup>silent</sup> contains a synonymous mutation (TACG to TACA)  
9 in *xfeA* that blocks post-transcriptional A-to-I editing at amino acid 408. *E. coli* strains  
10 BL21-2282 and BL21-2291 harbor pET-30a::*xoc\_2282* and pET-30a::*xoc\_2291*, respectively,  
11 and were used to produce the MCPs Xoc\_2282 and Xoc\_2291.

12 *E. coli* strains were cultured in Luria-Bertani (LB) medium at 37°C (Maniatis, Fritsch, &  
13 Sambrook, 1982). *Xoc* BLS256 strains were cultured at 28°C in nutrient broth (NB) or  
14 nutrient agar (NA) as described previously (Nie et al., 2020). The final concentrations of  
15 antibiotics in µg/mL were as follows: kanamycin, 25; streptonigrin, 1; and cephalexin, 40.  
16 Filter-sterilized 2,2'-dipyridyl (AR, Sinopharm Chemical Reagent Co., Ltd, China) and FeCl<sub>3</sub>  
17 (Sinopharm Chemical Reagent Co.) were prepared as 10 mM stocks and diluted to 50-150  
18 µM with NB when used. A crude extract containing enterobactin was kindly provided by Prof.  
19 Fu-Zhou Xu of Beijing Academy of Agriculture and Forestry Sciences. Enterobactin was  
20 purified as described previously (Zeng, Xu, & Lin, 2009) and diluted in H<sub>2</sub>O to prepare a 2  
21 mM solution; FeCl<sub>3</sub> (2 mM) was then added to prepare the Fe-Ent stock solution (1 mM).

22 Rice seeds were obtained from the International Rice Research Institute and grown in a

1 greenhouse as described previously (Nie et al., 2020)

2 **Bacterial mutant and strain construction.** Mutant strains were constructed as  
3 described previously (S. Wang et al., 2020). The coding region of *xfeA* was first amplified  
4 from *Xoc* BLS256 with primers *xfeA* F/R (Table S2), digested with *SalI/XhoI*, and subcloned  
5 in pKMS1 (Xie et al., 2011). The Fast Mutagenesis System (Transgen Biotech, Beijing,  
6 China) was used to obtain clones with the T408A and T408<sup>silent</sup> point mutations. Primers  
7 T408A F/R and T408<sup>silent</sup> F/R were used to introduce point mutations into *xfeA* by PCR (Table  
8 S2), and mutated *xfeA* alleles were introduced into BL256 by double homologous  
9 recombination as described previously (S. Wang et al., 2020).

10 The methyl-accepting chemotaxis proteins, *Xoc\_2282* and *Xoc\_2291*, were  
11 overexpressed in *E. coli* BL21(DE3). Full-length fragments of *xoc\_2282* and *xoc\_2291* were  
12 amplified with *Pfu* polymerase (TransGen Biotech, Beijing, China) using the *xoc2282* and  
13 *xoc2291* F/R primers (Table S2). These fragments were cloned, digested with *BamHI/HindIII*,  
14 ligated into pET-30a (+), and then transformed into *E. coli* BL21 (DE3) by heat shock at 42°C  
15 for 45 s. Transformants were selected on LB agar with kanamycin.

16 **RNA secondary structure prediction.** A sequence extending -25 to +25 bp from the  
17 edited site was used to model RNA secondary structure using the RNAfold web server  
18 (<http://rna.tbi.univie.ac.at/cgi-bin/RNAWebSuite/RNAfold.cgi>) as described (S. Wang et al.,  
19 2020).

20 **Protein structure prediction.** For secondary structure and 3D modeling, the XfeA  
21 sequence (Thr408 and Ala408) was submitted to the Phyre2 web site  
22 (<http://www.sbg.bio.ic.ac.uk/phyre2>) for modeling with multiple templates (Kelley et al.,

1 2015); exactly 797 residues (98%) were modeled at >90% confidence. Based on the XfeA  
2 models, the Thr408 and Ala408 residues were modeled using spheres where carbons in  
3  $\beta$ -strands were colored yellow and other carbons were shown in green. The hydrogen bonds  
4 located near Thr408 and Ala408 were displayed with Pymol (Schrödinger, 2015). The model  
5 of ferric enterobactin was retrieved from the PubChem website (CID: 34231), and the  
6 interaction with XfeA was predicted by Autodock Vina (Trott & Olson, 2010). Default values  
7 were used for the iteration limit and RMS gradient test.

8 **Bacterial growth assays in response to iron depletion.** Optical density (OD) was  
9 measured with a Bioscreen C instrument (Labsystem, Helsinki, Finland) as described  
10 previously (Nie et al., 2020). OD values at 420-580 nm were measured at 15 min intervals for  
11 24 h with continuous shaking at 28°C, and experiments included four independent replicates.  
12 Pairwise comparisons of growth curves for strains and growth conditions were analyzed with  
13 the *F*-test and compared with the curve obtained for T408<sup>silent</sup> mutant. OriginPro v. 9.5.1.195  
14 was used to graph, display and analyze the data.

15 **Analysis of intracellular iron.** *Xoc* cells were analyzed for iron content by ICP-OES  
16 (Optima 8000, PerkinElmer, MA USA) as reported previously (L. Wang et al., 2016). *Xoc*  
17 cells were grown to an OD<sub>600</sub>=1.0 in NB, collected by centrifugation, washed three times in  
18 sterile PBS (NaCl 8.5g/L, Na<sub>2</sub>HPO<sub>4</sub> 2.2g/L, NaH<sub>2</sub>PO<sub>4</sub> 0.4g/L, pH=7.0), and then inoculated  
19 into two-fold volumes of fresh NB supplemented with 50  $\mu$ M DP or 100  $\mu$ M FeCl<sub>3</sub>. After 3-5  
20 h (OD<sub>600</sub>~0.6), cells were harvested by centrifugation and washed in PBS; pelleted cells were  
21 then dried at 65°C for 48 h, and digested with acid (HNO<sub>3</sub>-HClO<sub>4</sub>, 4:1, v/v). The digested  
22 cellular material was transferred to a 25 mL volumetric flask, diluted to 25 mL in deionized



1 water, and iron was measured by ICP-OES. Samples that were not digested in acid were  
2 analyzed in parallel as controls. Iron concentrations were calculated by dividing the iron  
3 atomic value for  $10^9$  cells.

4 **Streptonigrin survival assays.** Survival in response to streptonigrin exposure was  
5 evaluated as described previously with slight modifications (Si et al., 2017). Log-phase  
6 ( $OD_{600}=0.6$ ) *Xoc* cells were harvested by centrifugation, washed three times in 0.01 M PBS  
7 buffer, and exposed to 1  $\mu\text{g}/\text{mL}$  streptonigrin for 16 h at  $28^\circ\text{C}$ . Cultures were then diluted,  
8 inoculated to NA, and colonies were counted as described (Nie et al., 2020). Survival was  
9 calculated by comparing viable cells counts with and without streptonigrin. This assay was  
10 performed in triplicate.

11 **Exposure of *Xoc* strains to DP or  $\text{FeCl}_3$ .** *Xoc* BLS256 was incubated at  $28^\circ\text{C}$  to  
12  $OD_{600}=1.0$  in NB with DP (50, 100 or 150  $\mu\text{M}$ ) or 100  $\mu\text{M}$   $\text{FeCl}_3$ . Aliquots were removed and  
13 cells were harvested by centrifugation at  $4^\circ\text{C}$ . Pellets were washed twice in cold PBS, and  
14 total RNA was extracted with the RNeasy Protect Bacteria Mini Kit (Qiagen). This  
15 experiment contained two biological replicates.

16 **PCR and qRT-PCR.** Total RNA (10  $\mu\text{g}/\text{sample}$ ) was isolated and used to synthesize  
17 cDNA as described previously (Nie et al., 2020). The *xfeA* transcript in cDNA samples was  
18 sequenced using the c T408 F/R primers (Table S2). The sequencing chromatograms were  
19 analyzed with Chromas Lite (Technelysium, Brisbane, Australia), and the frequency of  
20 editing was estimated by ratiometric A/G measurement as described (Nie et al., 2020).

21 The EasyPure RNA Kit was used to purify RNA as recommended (Transgen Biotech),  
22 and 1  $\mu\text{g}$  of RNA was used to synthesize cDNA with the Magic 1st cDNA Synthesis Kit

1 (Magic Biotech, Hangzhou, China). The cDNA product (20  $\mu$ l) was diluted to 100  $\mu$ l and  
2 used for qRT-PCR with Magic SYBR Green qPCR Mix (Magic Biotech) and the ABI 7500  
3 quantitative PCR system (Applied Biosystems, Foster City, CA). Expression was normalized  
4 with *rpoD* using the  $\Delta\Delta$ CT method as described (Nie et al., 2020). Experiments included  
5 three independent biological replicates.

6 **RNA sequencing and RNA-seq data analysis.** RNA-seq libraries were prepared using  
7 the Illumina Paired End Sample Prep kit as described previously (Fang et al., 2019). After  
8 removal of adaptors and low quality reads, RNA-seq reads were aligned to the *Xoc* BLS256  
9 genome using Tophat 2.0.7 (Trapnell, Pachter, & Salzberg, 2009), allowing for a maximum of  
10 two mismatched nucleotides. If reads mapped to more than one location in the genome, only  
11 the site showing the highest score was retained. Reads that mapped to tRNA or rRNA regions  
12 were removed; the remaining reads were mapped to the genome with HISAT2 (Kim, Paggi,  
13 Park, Bennett, & Salzberg, 2019) and used to generate a volcano plot. Bioconductor package  
14 edgeR (Robinson, McCarthy, & Smyth, 2010) with TMM normalization was used to  
15 determine DEGs as described (Nie et al., 2020). Reproducibility was evaluated for two  
16 replicate experiments using pairwise linear correlation analysis prior to comparing RNA-seq  
17 profiles.

18 DEGs with significance (FDR < 0.01; fold change > 2) were selected for further analysis  
19 (differential expression data,  
20 <https://drive.google.com/file/d/1FTiS4tQpVsyHcSvJKk4NtZZludVntRxE/view?usp=sharing>). Treeview  
21 1.1.6 and Cluster 3.0 (de Hoon, Imoto, Nolan, & Miyano, 2004; Saldanha, 2004) were  
22 utilized to produce heatmaps based on reads/kb of transcript per million mapped reads

1 (RPKM) (de Hoon et al., 2004; Saldanha, 2004).

2 **Capillary chemotaxis assay.** Chemotaxis was evaluated with the capillary method as  
3 described previously (Kumar Verma, Samal, & Chatterjee, 2018) with slight modifications.  
4 *Xoc* strains were grown in NB to OD<sub>600</sub>=1.0, centrifuged at 800 ×g for 6 min, washed with  
5 PBS three times and resuspended in 1 ml of PBS. Sterilized capillary tubes containing  
6 filter-sterilized glucose (attractant control, 2.0 mg/mL), serine (10 mg/mL), Fe-Ent (10 and  
7 100 μM) or 0.01 M PBS buffer (negative control) were incubated with *Xoc* strains at 28 °C  
8 for 4 h. To determine bacterial cell counts, the contents of capillaries were serially diluted  
9 (10-fold) in PBS and plated to NA (Fig. S3). The chemotaxis response relative to glucose was  
10 calculated as the number of migrated bacterial cells in the capillary minus the cells counted in  
11 PBS buffer, which would be attributed to random motility or diffusion.

12 **Kinetic analysis of MCP binding to FeCl<sub>3</sub> and Fe-Ent.** The MCPs *Xoc*\_2282 and  
13 *Xoc*\_2291 were purified from *E. coli* BL21-*xoc*2282 and BL21-*xoc*2291 (Table S1) using the  
14 BeyoGold His-tag purification resin (Beyotime, Shanghai, China); proteins were then  
15 concentrated with a molecular filter (30 kDa cut-off, (Millipore China, Shanghai, China).

16 Kinetic analysis of binding was performed with the Octet Red 96 system (ForteBio,  
17 Fremont, CA, USA) as described previously (Li et al., 2015) with several modifications.  
18 FeCl<sub>3</sub> or Fe-Ent was dissolved in PBS at a concentration of 50 μM, and the MCPs *Xoc*\_2282  
19 and *Xoc*\_2291 were diluted in PBS at 10 μM. After a baseline step, His-tag labeled  
20 *Xoc*\_2282 and *Xoc*\_2291 were bound to the Octet Red Ni-NTA biosensors, washed and  
21 blocked with BSA buffer (0.2% BSA and 0.02% Tween-20 in PBS buffer). The biosensors  
22 were incubated for 300 s with 50 μM FeCl<sub>3</sub> or Fe-Ent to facilitate association and incubated

1 with PBS for 600 s to determine the dissociation rate. Octet Data Analysis HT v. 12 software  
2 was used to fit the curve.

3 For analysis with the Biacore 8K surface plasmon resonance system (Jason-Moller,  
4 Murphy, & Bruno, 2006), Xoc\_2282 or Xoc\_2291 (10  $\mu\text{g}/\text{mL}$ ) were dissolved in sodium  
5 acetate buffer (pH=4.0) and bound to the CM5 chip for 1200 s in PBS buffer (pH=7.4) to  
6 ensure that >10,000 units of protein were loaded. Eight, serial two-fold concentrations of  
7 Fe-Ent were used for measuring and recording the response units (RU), and the final  
8 concentration of Fe-Ent was 0.078, 0.156, 0.3125, 0.625, 1.25, 2.5, 5 and 10  $\mu\text{M}$ . PBS-T  
9 buffer (0.01 M PBS, 0.05% Tween 20, pH=7.4) was used to disassociate Fe-Ent and MCP  
10 proteins for 3000 s. Response units were analyzed with Biacore Insight Evaluation software  
11 and kinetic rate constants were calculated ( $K_D=K_d/K_a$ ; where  $K_D$  is the dissociation  
12 equilibrium constant,  $K_d$  is the dissociation constant, and  $K_a$  is association constant).

13 **Plant inoculation assays.** Suspensions of *Xoc* ( $\text{OD}_{600}=0.6$ ) were used to inoculate  
14 six-week-old rice. Symptoms and bacterial populations were described and enumerated using  
15 established methods (Nie et al., 2020).

16 **Data availability.** All sequence data generated in this study were deposited in NCBI as  
17 BioProject no. PRJNA673071.

18

## 19 **ACKNOWLEDGEMENTS**

20 We thank Prof. Fu-Zhou Xu for providing Fe-Ent and Prof. Wei Qian for valuable  
21 suggestions. This work was supported by National Key R&D Program of China  
22 (2018YFD0201202, 2017YFD0201108), the Agri-X Interdisciplinary Fund of Shanghai Jiao

1 Tong University (Agri-X2017010), the State Key Laboratory for Biology of Plant Diseases  
2 and Insect Pests (SKLOF201802), Shanghai Committee of Science and Technology  
3 (19390743300 and 21ZR1435500), National Natural Science Foundation of China (31200003,  
4 31770772) and Joint Research Funds for Translational Medicine at Shanghai Jiao Tong  
5 University (ZH2018ZDA06).  
6

## 1   **REFERENCES**

- 2   Bar-Yaacov, D., Mordret, E., Towers, R., Biniashvili, T., Soyris, C., Schwartz, S., . . . Pilpel, Y. (2017).  
3         RNA editing in bacteria recodes multiple proteins and regulates an evolutionarily conserved  
4         toxin-antitoxin system. *Genome Research*, *27*(10), 1696-1703.
- 5   Bian, Z., Ni, Y., Xu, J.-R., & Liu, H. (2019). A-to-I mRNA editing in fungi: occurrence, function, and  
6         evolution. *Cellular and Molecular Life Sciences*, *76*(2), 329-340.
- 7   Bradley, J. M., Svistunenko, D. A., Wilson, M. T., Hemmings, A. M., Moore, G. R., & Le Brun, N. E.  
8         (2020). Bacterial iron detoxification at the molecular level. *Journal of Biological Chemistry*,  
9         *295*(51), 17602-17623.
- 10   Buchanan, S. K., Smith, B. S., Venkatramani, L., Xia, D., Esser, L., Palnitkar, M., . . . Deisenhofer, J.  
11         (1999). Crystal structure of the outer membrane active transporter FepA from *Escherichia coli*.  
12         *Nature Structural Biology*, *6*(1), 56-63.
- 13   Byun, H., Jung, I.-J., Chen, J., Valencia, J. L., & Zhu, J. (2020). Siderophore piracy enhances *Vibrio*  
14         cholerae environmental survival and pathogenesis. *Microbiology*, *166*(11), 1038–1046.
- 15   Carnielli, C. M., Artier, J., de Oliveira, J. C. F., & Novo-Mansur, M. T. M. (2017). *Xanthomonas citri*  
16         subsp. *citri* surface proteome by 2D-DIGE: ferric enterobactin receptor and other outer  
17         membrane proteins potentially involved in citric host interaction. *Journal of proteomics*, *151*,  
18         251-263.
- 19   de Hoon, M. J. L., Imoto, S., Nolan, J., & Miyano, S. (2004). Open source clustering software.  
20         *Bioinformatics*, *20*(9), 1453-1454.
- 21   Fang, Y., Wang, H., Liu, X., Xin, D., Rao, Y., & Zhu, B. (2019). Transcriptome analysis of  
22         *Xanthomonas oryzae* pv. *oryzicola* exposed to H<sub>2</sub>O<sub>2</sub> reveals horizontal gene transfer

- 1 contributes to its oxidative stress response. *PLoS ONE*, 14(10), e0218844.
- 2 Ferguson, A. D., & Deisenhofer, J. (2002). TonB-dependent receptors—structural perspectives.  
3 *Biochimica et Biophysica Acta*, 1565(2), 318-332.
- 4 Fischbach, M. A., Lin, H., Liu, D. R., & Walsh, C. T. (2006). How pathogenic bacteria evade  
5 mammalian sabotage in the battle for iron. *Nature Chemical Biology*, 2(3), 132-138.
- 6 Gao, L., Altae-Tran, H., Böhning, F., Makarova, K. S., Segel, M., Schmid-Burgk, J. L., . . . Zhang, F.  
7 (2020). Diverse enzymatic activities mediate antiviral immunity in prokaryotes. *Science*,  
8 369(6507), 1077-1084.
- 9 González, J. F., Degrassi, G., Devescovi, G., De Vleeschauwer, D., Höfte, M., Myers, M. P., & Venturi,  
10 V. (2012). A proteomic study of *Xanthomonas oryzae* pv. *oryzae* in rice xylem sap. *Journal of*  
11 *proteomics*, 75(18), 5911-5919.
- 12 Hantke, K. (2001). Iron and metal regulation in bacteria. *Current Opinion in Microbiology*, 4(2),  
13 172-177.
- 14 Hassan, H. M., & Troxell, B. (2013). Transcriptional regulation by Ferric Uptake Regulator (Fur) in  
15 pathogenic bacteria. *Frontiers in cellular and infection microbiology*, 3, 59.
- 16 Hider, R. C., & Kong, X. (2010). Chemistry and biology of siderophores. *Natural Product Reports*, 27(5),  
17 637-657.
- 18 Hood, M. I., & Skaar, E. P. (2012). Nutritional immunity: transition metals at the pathogen–host  
19 interface. *Nature Reviews Microbiology*, 10(8), 525-537.
- 20 Jason-Moller, L., Murphy, M., & Bruno, J. (2006). Overview of Biacore systems and their applications.  
21 *Current protocols in protein science*, 45(1), 19.13. 11-19.13. 14.
- 22 Kehl-Fie, T. E., & Skaar, E. P. (2010). Nutritional immunity beyond iron: a role for manganese and zinc.

- 1            *Current Opinion in Chemical Biology*, 14(2), 218-224.
- 2    Kelley, L. A., Mezulis, S., Yates, C. M., Wass, M. N., & Sternberg, M. J. (2015). The Phyre2 web portal  
3            for protein modeling, prediction and analysis. *Nature Protocols*, 10(6), 845-858.
- 4    Kim, D., Paggi, J. M., Park, C., Bennett, C., & Salzberg, S. L. (2019). Graph-based genome alignment  
5            and genotyping with HISAT2 and HISAT-genotype. *Nature Biotechnology*, 37(8), 907-915.
- 6    Kumar Verma, R., Samal, B., & Chatterjee, S. (2018). *Xanthomonas oryzae* pv. *oryzae* chemotaxis  
7            components and chemoreceptor Mcp2 are involved in the sensing of constituents of xylem sap  
8            and contribute to the regulation of virulence-associated functions and entry into rice. *Molecular*  
9            *Plant Pathology*, 19(11), 2397-2415.
- 10    Li, H., Tao, Y., Zhao, P., Ban, X., Zhi, D., Li, G., . . . Huai, L. (2015). Recognition of receptors on  
11            bone marrow-derived dendritic cells bound with *Pholiota nameko* polysaccharides.  
12            *International Journal of Biological Macromolecules*, 72, 649-657.
- 13    Ma, L., Kaserer, W., Annamalai, R., Scott, D. C., Jin, B., Jiang, X., . . . Ferreira, L. C. (2007). Evidence  
14            of ball-and-chain transport of ferric enterobactin through FepA. *Journal of Biological Chemistry*,  
15            282(1), 397-406.
- 16    Maniatis, T., Fritsch, E. F., & Sambrook, J. (1982). *Molecular cloning: a laboratory manual* (Vol. 545):  
17            Cold spring harbor laboratory Cold Spring Harbor, NY.
- 18    McHugh, J. P., Rodríguez-Quñones, F., Abdul-Tehrani, H., Svistunenko, D. A., Poole, R. K., Cooper,  
19            C. E., & Andrews, S. C. (2003). Global iron-dependent gene regulation in *Escherichia coli*: a  
20            new mechanism for iron homeostasis. *Journal of Biological Chemistry*, 278(32), 29478-29486.
- 21    Milburn, M. V., Prive, G. G., Milligan, D. L., Scott, W. G., Yeh, J., Jancarik, J., . . . Kim, S.-H. (1991).  
22            Three-dimensional structures of the ligand-binding domain of the bacterial aspartate receptor



- 1 with and without a ligand. *Science*, *254*(5036), 1342-1347.
- 2 Moynié, L., Milenkovic, S., Mislin, G. L., Gasser, V., Mallocci, G., Baco, E., . . . Ceccarelli, M. (2019).
- 3 The complex of ferric-enterobactin with its transporter from *Pseudomonas aeruginosa*
- 4 suggests a two-site model. *Nature communications*, *10*(1), 1-14.
- 5 Muok, A. R., Deng, Y., Gumerov, V. M., Chong, J. E., DeRosa, J. R., Kurniyati, K., . . . Zhulin, I. B.
- 6 (2019). A di-iron protein recruited as an Fe [III] and oxygen sensor for bacterial chemotaxis
- 7 functions by stabilizing an iron-peroxy species. *Proceedings of the National Academy of*
- 8 *Sciences of the United States of America*, *116*(30), 14955-14960.
- 9 Newton, S. M., Igo, J. D., Scott, D. C., & Klebba, P. E. (1999). Effect of loop deletions on the binding
- 10 and transport of ferric enterobactin by FepA. *Molecular Microbiology*, *32*(6), 1153-1165.
- 11 Nie, W., Wang, S., He, R., Xu, Q., Wang, P., Wu, Y., . . . Chen, G. (2020). A-to-I RNA editing in
- 12 bacteria increases pathogenicity and tolerance to oxidative stress. *PLoS Pathogens*, *16*(8),
- 13 e1008740.
- 14 Noinaj, N., Guillier, M., Barnard, T. J., & Buchanan, S. K. (2010). TonB-dependent transporters:
- 15 regulation, structure, and function. *Annual Review of Microbiology*, *64*, 43-60.
- 16 Pandey, A., & Sonti, R. V. (2010). Role of the FeoB protein and siderophore in promoting virulence of
- 17 *Xanthomonas oryzae* pv. *oryzae* on rice. *Journal of Bacteriology*, *192*(12), 3187-3203.
- 18 Raines, D. J., Moroz, O. V., Blagova, E. V., Turkenburg, J. P., Wilson, K. S., & Duhme-Klair, A.-K.
- 19 (2016). Bacteria in an intense competition for iron: Key component of the *Campylobacter jejuni*
- 20 iron uptake system scavenges enterobactin hydrolysis product. *Proceedings of the National*
- 21 *Academy of Sciences of the United States of America*, *113*(21), 5850-5855.
- 22 Raymond, K. N., Dertz, E. A., & Kim, S. S. (2003). Enterobactin: an archetype for microbial iron

- 1 transport. *Proceedings of the National Academy of Sciences of the United States of America*,  
2 *100*(7), 3584-3588.
- 3 Robinson, M. D., McCarthy, D. J., & Smyth, G. K. (2010). edgeR: a Bioconductor package for  
4 differential expression analysis of digital gene expression data. *Bioinformatics*, *26*(1), 139-140.
- 5 Ryan, R. P., Vorhölter, F.-J., Potnis, N., Jones, J. B., Van Sluys, M.-A., Bogdanove, A. J., & Dow, J. M.  
6 (2011). Pathogenomics of *Xanthomonas*: understanding bacterium–plant interactions. *Nature*  
7 *Reviews Microbiology*, *9*(5), 344-355.
- 8 Safra, M., Sas-Chen, A., Nir, R., Winkler, R., Nachshon, A., Bar-Yaacov, D., . . . Schwartz, S. (2017).  
9 The m1A landscape on cytosolic and mitochondrial mRNA at single-base resolution. *Nature*,  
10 *551*(7679), 251-255. doi:10.1038/nature24456
- 11 Saldanha, A. J. (2004). Java Treeview—extensible visualization of microarray data. *Bioinformatics*,  
12 *20*(17), 3246-3248.
- 13 Schaffer, A. A., Kopel, E., Hendel, A., Picardi, E., Levanon, E. Y., & Eisenberg, E. (2020). The cell line  
14 A-to-I RNA editing catalogue. *Nucleic Acids Research*, *48*(11), 5849-5858.
- 15 Schalk, I. J., Mislin, G. L., & Brillet, K. (2012). Structure, function and binding selectivity and  
16 stereoselectivity of siderophore–iron outer membrane transporters. In *Current topics in*  
17 *membranes* (Vol. 69, pp. 37-66): Elsevier.
- 18 Schrödinger, L. (2015). The PyMOL molecular graphics system, version 1.8. In: November.
- 19 Si, M., Zhao, C., Burkinshaw, B., Zhang, B., Wei, D., Wang, Y., . . . Shen, X. (2017). Manganese  
20 scavenging and oxidative stress response mediated by type VI secretion system in  
21 *Burkholderia thailandensis*. *Proceedings of the National Academy of Sciences of the United*  
22 *States of America*, *114*(11), E2233-E2242.

- 1 Skaar, E. P. (2010). The battle for iron between bacterial pathogens and their vertebrate hosts. *PLoS*  
2 *Pathogens*, *6*(8), e1000949.
- 3 Timilsina, S., Potnis, N., Newberry, E. A., Liyanapathirana, P., Iruegas-Bocardo, F., White, F. F., . . .  
4 Jones, J. B. (2020). *Xanthomonas* diversity, virulence and plant–pathogen interactions. *Nature*  
5 *Reviews Microbiology*, *18*(8), 415-427.
- 6 Torres, A. G., Piñeyro, D., Filonava, L., Stracker, T. H., Batlle, E., & de Poupiana, L. R. (2014). A-to-I  
7 editing on tRNAs: biochemical, biological and evolutionary implications. *FEBS Letters*, *588*(23),  
8 4279-4286.
- 9 Trapnell, C., Pachter, L., & Salzberg, S. L. (2009). TopHat: discovering splice junctions with RNA-Seq.  
10 *Bioinformatics*, *25*(9), 1105-1111.
- 11 Trott, O., & Olson, A. J. (2010). AutoDock Vina: improving the speed and accuracy of docking with a  
12 new scoring function, efficient optimization, and multithreading. *Journal of computational*  
13 *chemistry*, *31*(2), 455-461.
- 14 Ud-Din, A. I. M. S., & Roujeinikova, A. (2017). Methyl-accepting chemotaxis proteins: a core sensing  
15 element in prokaryotes and archaea. *Cellular and Molecular Life Sciences*, *74*(18), 3293-3303.
- 16 Wang, L., Pan, Y., Yuan, Z.-H., Zhang, H., Peng, B.-Y., Wang, F.-F., & Qian, W. (2016).  
17 Two-component signaling system VgrRS directly senses extracytoplasmic and intracellular  
18 iron to control bacterial adaptation under iron depleted stress. *PLoS Pathogens*, *12*(12),  
19 e1006133.
- 20 Wang, S., Nie, W., Gong, Q., Lee, Y., Shui, H., Chen, G., & Zhu, B. (2020). Complete Genomic Data of  
21 *Burkholderia glumae* Strain GX Associated with Bacterial Panicle Blight of Rice in China. *Plant*  
22 *Disease*, *104*(6), 1578-1580.

- 1 Wuichet, K., & Zhulin, I. B. (2010). Origins and diversification of a complex signal transduction system  
2 in prokaryotes. *Science signaling*, *3*(128), ra50-ra50.
- 3 Wyckoff, E. E., Allred, B. E., Raymond, K. N., & Payne, S. M. (2015). Catechol siderophore transport  
4 by *Vibrio cholerae*. *Journal of Bacteriology*, *197*(17), 2840-2849.
- 5 Xie, G.-L., Zhang, G.-Q., Liu, H., Lou, M.-M., Tian, W.-X., Li, B., . . . Jin, G.-L. (2011). Genome  
6 sequence of the rice-pathogenic bacterium *Acidovorax avenae* subsp. *avenae* RS-1. *Journal*  
7 *of Bacteriology*, *193*(18), 5013-5014.
- 8 Xu, S., Pan, X., Luo, J., Wu, J., Zhou, Z., Liang, X., . . . Zhou, M. (2015). Effects of  
9 phenazine-1-carboxylic acid on the biology of the plant-pathogenic bacterium *Xanthomonas*  
10 *oryzae* pv. *oryzae*. *Pesticide Biochemistry and Physiology*, *117*, 39-46.
- 11 Yablonovitch, A. L., Deng, P., Jacobson, D., & Li, J. B. (2017). The evolution and adaptation of A-to-I  
12 RNA editing. *PLoS Genetics*, *13*(11), e1007064. doi:10.1371/journal.pgen.1007064
- 13 Yeowell, H. N., & White, J. R. (1982). Iron requirement in the bactericidal mechanism of *streptonigrin*.  
14 *Antimicrobial Agents and Chemotherapy*, *22*(6), 961-968.
- 15 Zeng, X., Xu, F., & Lin, J. (2009). Molecular, antigenic, and functional characteristics of ferric  
16 enterobactin receptor CfrA in *Campylobacter jejuni*. *Infection and Immunity*, *77*(12), 5437.

17

## 18 **Figure Legends**

19 **Figure 1.** Analysis of A-to-I RNA editing in *xfeA* (T408A). (a) Percentage of editing as  
20 determined by sequence analysis of cDNA in *Xoc* BL256 (wild-type, WT) grown in NB,  
21 NB+50  $\mu$ M 2,2'-dipyridyl (DP, iron chelator), NB+100  $\mu$ M DP, NB+150  $\mu$ M DP, and  
22 NB+100  $\mu$ M FeCl<sub>3</sub>. The *Xoc*  $\Delta$ *tadA* mutant containing a deletion in the gene encoding

1 tRNA-specific adenosine deaminase is also included and was cultivated in NB. PCR  
2 fragments were obtained from cDNA derived from mRNA using primers described in  
3 Methods. Samples were incubated overnight to log phase and then subjected to Sanger  
4 sequencing. Three independent biological replicates were carried out in this study. \*\*\*,  
5 significant at  $P < 0.001$ ; N.S., no significance. (b) Chromatograms reveal editing in different  
6 *Xoc* strains and culture conditions. The edited region, TACG, is framed by the blue rectangle  
7 in the template cDNA, and the percentage of bases edited from A (green) to G (black) is  
8 represented by peak height inside the red rectangle. In the chromatogram of the T408<sup>silent</sup>  
9 strain, the red arrow indicates where A-to-I editing is blocked.

10

11 **Figure 2.** T408A RNA editing modulates bacterial responses to iron concentrations. (a)  
12 Growth curve of *Xoc* T408A, T408<sup>silent</sup> and WT in NB medium. Strains were grown in  
13 quadruplicate to mid-exponential phase, diluted to OD<sub>600</sub>=0.1, transferred to fresh NB and  
14 monitored for growth in a Bioscreen C apparatus at 28°C. Growth in NB supplemented with  
15 (b) 50 μM, (c) 100 μM, and (d) 150 μM DP. Error intervals (shaded regions bordering each  
16 line) indicate mean ± SE of four replicates. The F-test was used to compare growth of the  
17 T408A and WT strains with T408<sup>silent</sup>; \* and \*\* indicate significance at  $P < 0.05$  and 0.01,  
18 respectively. (e) Iron content in *Xoc* T408A, T408<sup>silent</sup> and WT strains. Bacterial cells were  
19 cultured in NB, NB + 50 μM DP or NB + 100 μM FeCl<sub>3</sub>. The iron content in *Xoc* was  
20 measured with inductively-coupled plasma spectroscopy (ICP-OES). (f) Survival rates of *Xoc*  
21 T408A, T408<sup>silent</sup> and WT strains exposed to streptonigrin. Strains were grown to mid-log  
22 phase (OD<sub>600</sub>=0.5) in NB or NB+DP and treated with 1 μg/ml streptonigrin for 24 h. Survival

1 was assessed by colony counts from 10-fold serial dilutions. Error bars in (e) and (f) represent  
2 standard deviations ( $n = 3$ ). \* and \*\* indicate significant differences between the T408A or  
3 WT strains with T408<sup>silent</sup> (control) at  $P < 0.05$  and  $0.01$ , respectively (Student's  $t$ -test).

4

5 **Figure 3.** The upregulation of genes involved in chemotaxis enhances sensitivity to  
6 ferrienterobactin (Fe-Ent). (a) RNA-seq analysis of T408A and T408<sup>silent</sup> strains. Volcano plot  
7 shows FDR values and fold-change of expression in T408A versus T408<sup>silent</sup>. Red dots  
8 indicate upregulated genes with  $FDR < 0.01$ , and blue dots indicate downregulated genes with  
9  $FDR < 0.01$ . (b) Expression of selected chemotaxis pathway genes in *Xoc* strains T408A and  
10 T408<sup>silent</sup>. Bacterial cells were cultured in NB+50  $\mu$ M DP, NB, or NB+100  $\mu$ M FeCl<sub>3</sub>.  
11 Expression was normalized with *rpoD* and the  $\Delta\Delta$ CT method where CT is the threshold cycle.  
12 Three independent biological replicates were carried out in this experiment. Asterisks  
13 represent significant differences between T408A and T408<sup>silent</sup> at  $P < 0.01$  (\*\*) or  $0.001$  (\*\*\*)  
14 using the Student's  $t$ -test. (c) Upregulated genes in the chemotaxis pathway based on  
15 RNA-seq. Upregulated genes are indicated in green. Model was based on the KEGG  
16 chemotaxis pathway (<https://www.genome.jp/entry/map02030>). (d) Chemotactic response of  
17 *Xoc* WT, T408A, and T408<sup>silent</sup> strains in response to glucose (2.0 mg/mL), serine (10  
18 mg/mL), Fe-Ent (10  $\mu$ M and 100  $\mu$ M) and PBS buffer (representing random diffusion).  
19 Relative chemotactic response values were calculated as a function of the number of migrated  
20 bacterial cells. Asterisks represent significant differences at  $P < 0.05$  (\*\*) or  $0.01$  (\*\*) using  
21 the Student's  $t$ -test.

22

1 **Figure 4.** Binding analysis of MCPs Xoc\_2282 and Xoc\_2291 to FeCl<sub>3</sub> and Fe-Ent. (a)  
2 Real-time association and dissociation analysis of (a) Xoc\_2282 and (b) Xoc\_2291 binding to  
3 50 μM FeCl<sub>3</sub> using the Octet Red System (ORS); brown line, association curve; red, fitted  
4 curve. Association and dissociation analysis of (c) Xoc\_2282 and (d) Xoc\_2291 binding to 50  
5 μM Fe-Ent using ORS; blue and green represent association curves; red, fitted curves. The  
6 two MCPs were bound to the Ni-NTA sensor, washed and blocked. Biosensors were then  
7 incubated with FeCl<sub>3</sub> or Fe-Ent in PBS buffer to facilitate association with the MCPs, and  
8 biosensors were incubated with PBS buffer to determine dissociation rates. Analysis of the (e)  
9 Xoc\_2282/Fe-Ent and (f) Xoc\_2291/Fe-Ent interactions with the Biacore 8K system. Eight  
10 serial two-fold concentrations of Fe-Ent were used for measuring response units (RU).  
11 PBS-T buffer was used for disassociating the Fe-Ent and MCP complex for 3000 s (blue,  
12 association curve; black, fitted curve). RUs were analyzed with Biacore Insight Evaluation  
13 software.

14

15 **Figure 5.** Virulence and growth of *Xoc* strains in rice cv. Yuanfengzao. Virulence was  
16 assessed by inoculating six-week-old susceptible Yuanfengzao rice plants with *Xoc* strains. (a)  
17 Symptoms on rice leaves inoculated with *Xoc* T408A, T408<sup>silent</sup> and WT. (b) Lesion length  
18 of *Xoc* T408A, T408<sup>silent</sup> and WT in rice cv. Yuanfengzao. Leaves ( $n=13$ ) were inoculated  
19 with needleless syringes and evaluated for lesion length 14 days after inoculation. Values  
20 represent the mean lesion length  $\pm$  SD. The (×) indicates an abnormally high or low value  
21 that was excluded from statistical analysis. The asterisks (\*) indicate significant differences  
22 between the lesion length obtained for *Xoc* T408A and WT as compared to the T408<sup>silent</sup>

1 strain (\*,  $P < 0.05$ ; \*\*\*,  $P < 0.001$ ; ANOVA with Dunnett's post-hoc correction).  
2 (c) Population dynamics of *Xoc* T408A, T408<sup>silent</sup> and WT *in planta* (means  $\pm$  SD). Infected  
3 leaves ( $n=3$ ) were excised around the inoculation site, macerated, and then plated in serial  
4 dilutions to NB agar with cephalixin. \*,  $P < 0.05$ ; \*\*,  $P < 0.01$ .

5  
6 **Figure 6.** Homology modeling of XfeA in *Xoc* strains. (a) Model of XfeA in wild-type *Xoc*  
7 BL256 using multiple templates available at the Phyre2 web site. The backbone  $\beta$ -strands are  
8 depicted in yellow, and the 22-stranded transmembrane  $\beta$ -barrel and plug domains are shown  
9 in green. The threonine residue (Thr408) is depicted with spheres. (b) Model of XfeA in the  
10 T408A mutant. The red arrow indicates the truncated  $\beta$ -strands at the Ala408 residue, which  
11 are shown using spheres. Panels (c) and (d) show hydrogen bonding around residue 408 in  
12 XfeA. The altered H bonds (orange dotted line) surrounding Thr408 (Fig. 6c) and Ala408  
13 (Fig. 6d) are shown. Carbon atoms at residue 408 are shown in yellow;  $\alpha$ -helices and turns  
14 are shown in green, oxygen atoms are depicted in red, and nitrogen atoms are colored blue.

15  
16 **Figure 7.** Proposed regulation of iron homeostasis by A-to-I editing in *xfeA*. Under  
17 iron-depleted conditions or *in planta*, T408A editing levels within *xfeA* are enhanced and  
18 genes encoding MCPs are upregulated. *X. oryzae* is chemotactically attracted to Fe-Ent,  
19 which is transported across the bacterial membranes.  $Fe^{3+}$  is converted to  $Fe^{2+}$  in the  
20 cytoplasm and used for various reactions, including responses and pathways that contribute to  
21 pathogen virulence. In iron replete conditions, A-to-I editing in *xfeA* is reduced.

22



1 **Appendixes**

2 **Figure S1.** Normalized expression levels of selected chemotaxis pathway genes (*xoc\_2278*,  
3 *xoc\_2280*, *xoc\_2289*, *xoc\_2291*, and *xoc\_2297*) and *xfeA* in *Xoc* BLS256. Wild-type BL256  
4 was cultivated in NB, NB+50  $\mu$ M 2,2'-dipyridyl (DP, iron chelator), and NB+100  $\mu$ M FeCl<sub>3</sub>.  
5 Gene expression levels were calculated relative to *rpoD* using the  $\Delta\Delta$ CT method, where CT is  
6 the threshold cycle. Three independent biological replicates were carried out in this study.

7

8 **Figure S2.** Prediction of the mutation site in *Xoc* T408A. RNA secondary structure analysis  
9 (<http://rna.tbi.univie.ac.at/>) showed that the edited site was embedded within a loop (see  
10 arrow). Color is used to show base-pair probabilities.

11

12 **Figure S3.** Diagram of capillary chemotaxis assay.

13

14 **Figure S4.** Verification of *xfeA* T408A A-to-I editing site by Sanger sequencing using gDNA  
15 as the template. Chromatograms show editing in *Xoc* BL256 (wild-type, WT) grown in NB,  
16 NB+50  $\mu$ M DP, NB+100  $\mu$ M DP, NB+150  $\mu$ M DP, and NB+100  $\mu$ M FeCl<sub>3</sub>. The *Xoc* *AtadA*  
17 and T408<sup>silent</sup> mutants were grown in NB and included for comparison.

18

19 **Figure S5.** Predicted secondary structure of XfeA based on analysis with the Phyre2 web site.  
20 Structure of XfeA in *Xoc* (a) T408<sup>silent</sup> (no editing) and (b) the T408A mutant (with editing).  
21 The latter mutant contains a truncation in the  $\beta$ -strand (red arrow and rectangle).

22

- 1 **Figure S6.** Homology modeling of XfeA showing the predicted site of ferrienterobactin
- 2 binding. The model was constructed with AutoDock Vina.
- 3
- 4 Table S1. Strains and plasmids used in this study.
- 5
- 6 Table S2. Primers used in this study.
- 7
- 8 Table S3. Differentially regulated chemotaxis genes in *Xoc* T408A and T408<sup>silent</sup> identified by
- 9 RNA-seq.
- 10
- 11 Table S4. A-to-I RNA editing in *Xoc* T408A strain and T408<sup>silent</sup> strain.
- 12

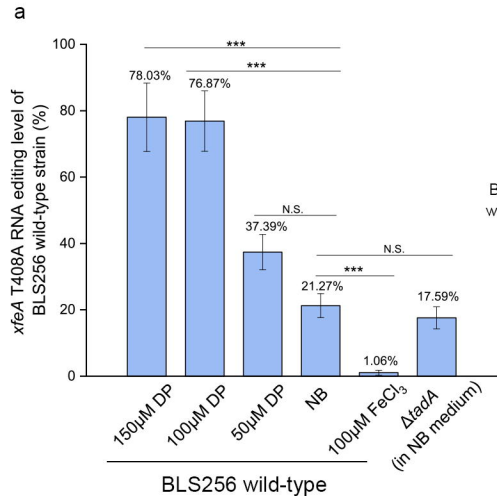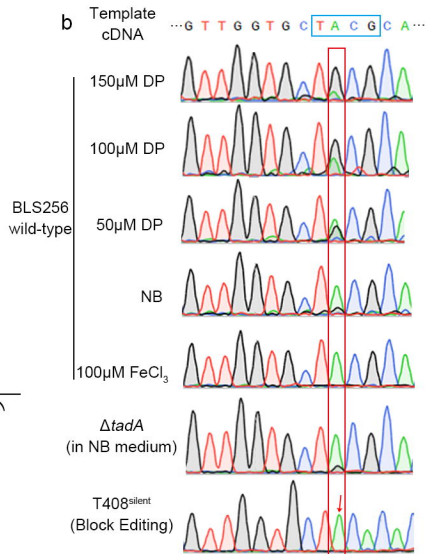

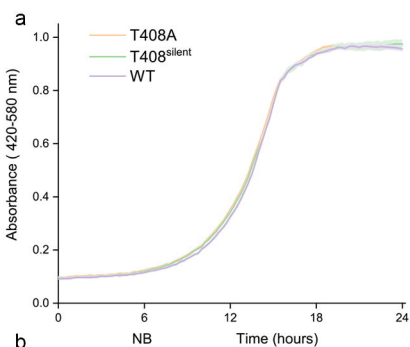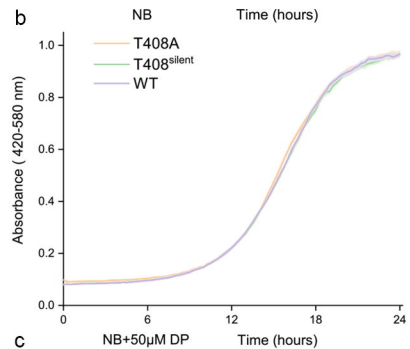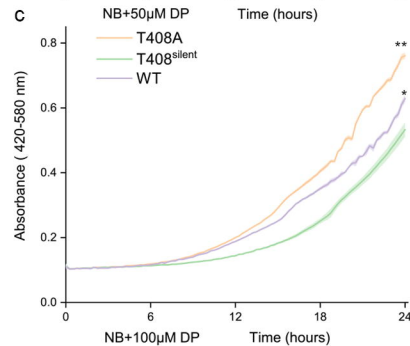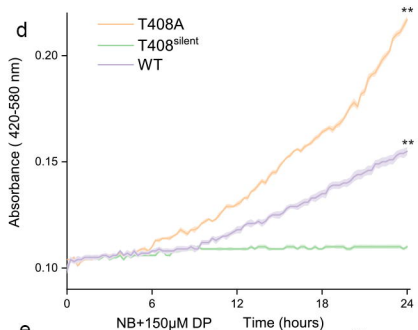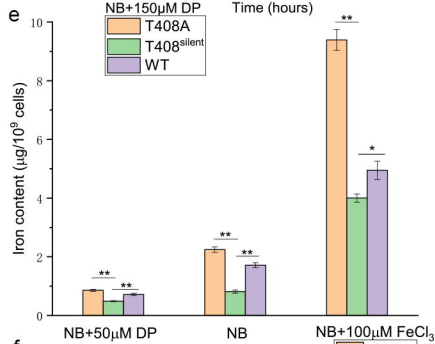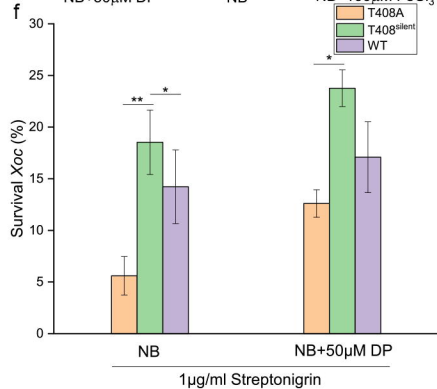

\* P < 0.05 \*\* P < 0.01

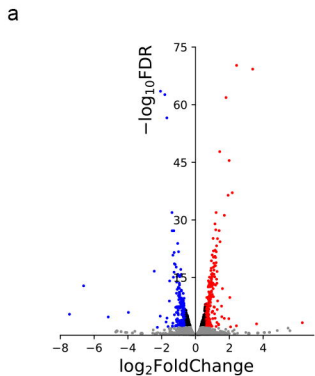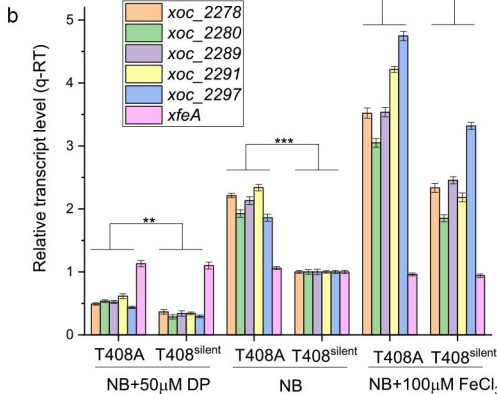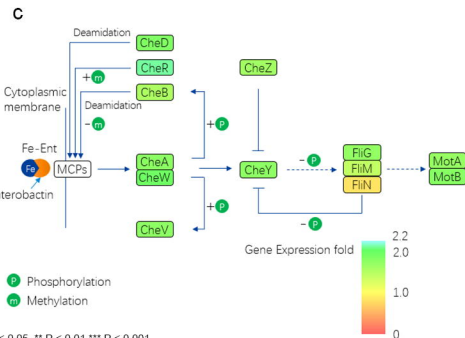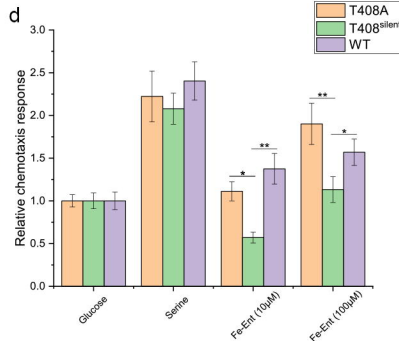

\*  $P < 0.05$  \*\*  $P < 0.01$  \*\*\*  $P < 0.001$

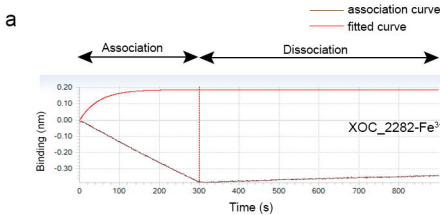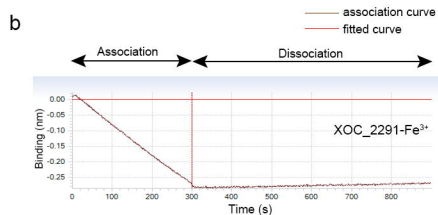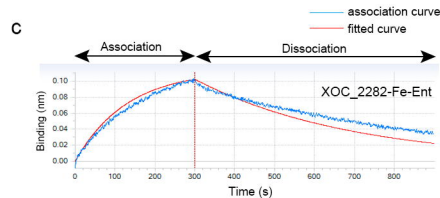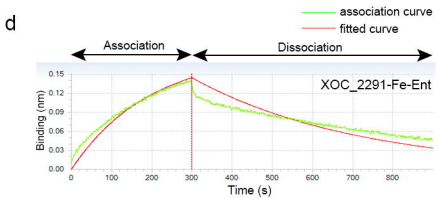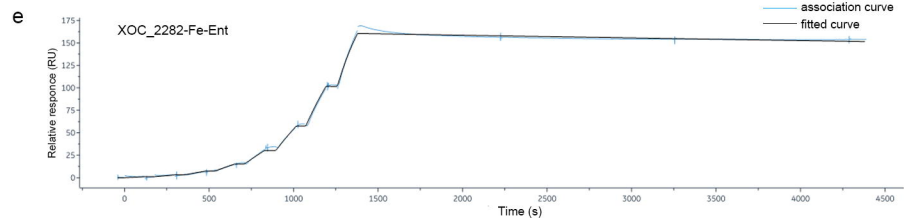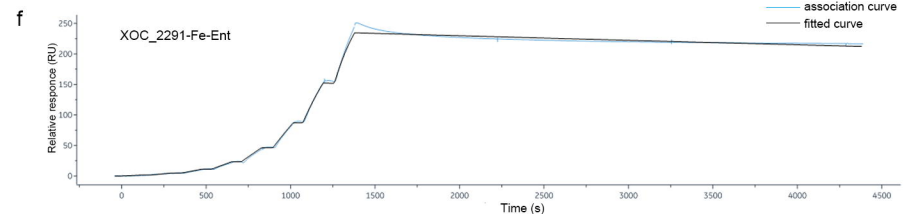

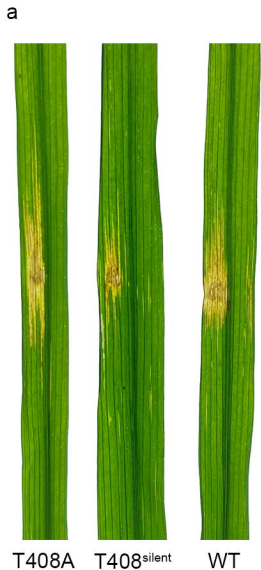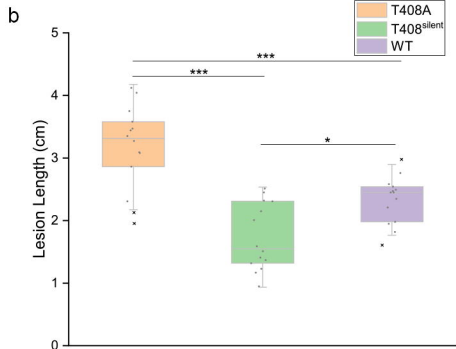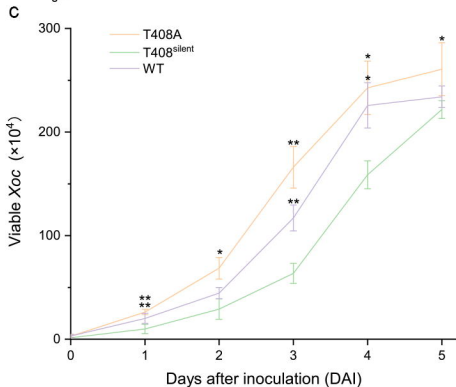

\*  $P < 0.05$  \*\*  $P < 0.01$  \*\*\*  $P < 0.001$

**a**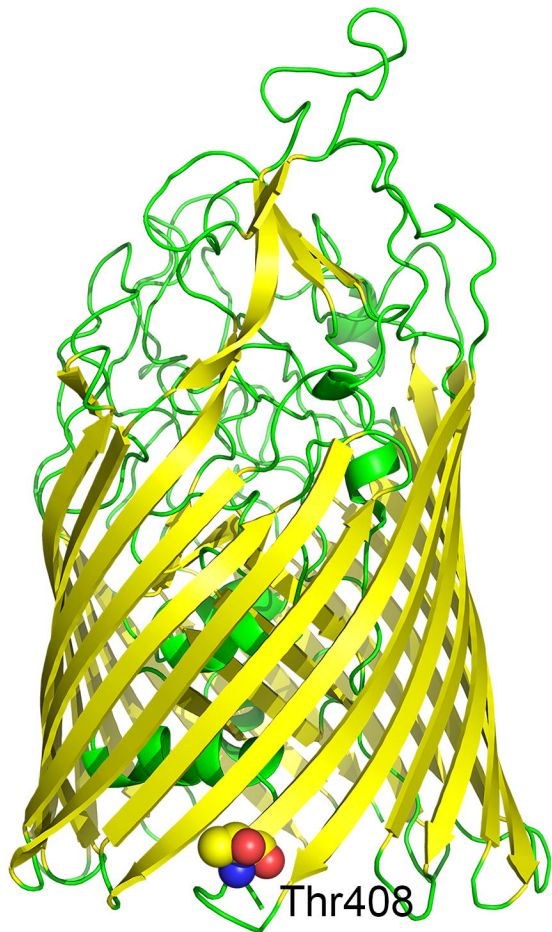**b**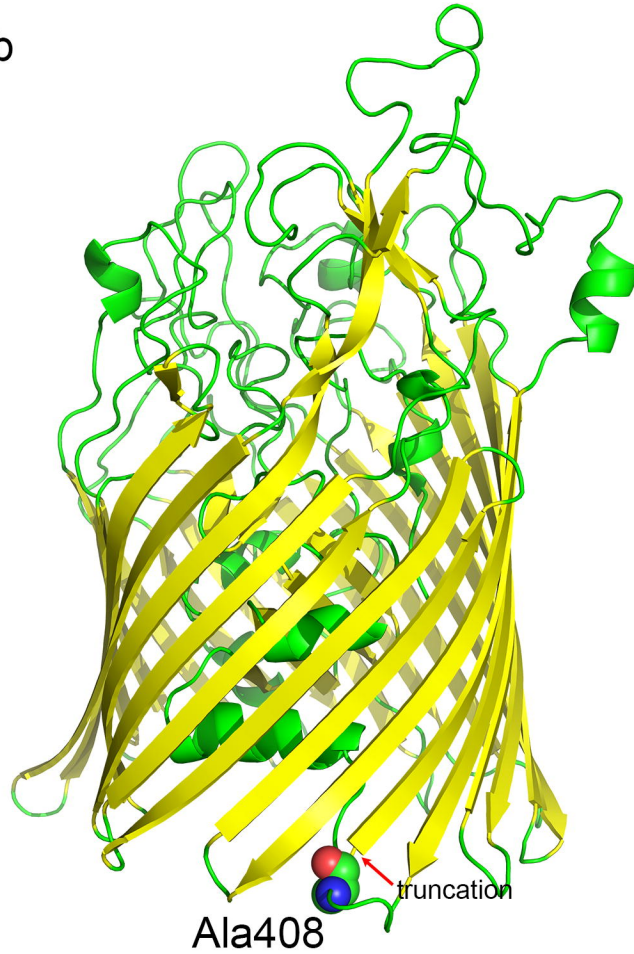**c**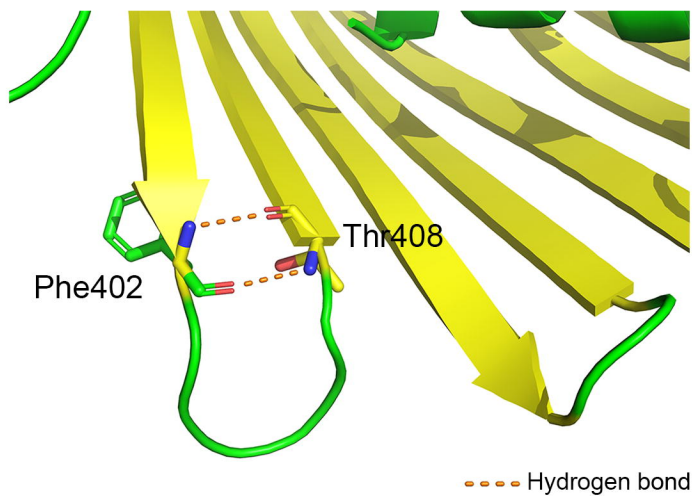**d**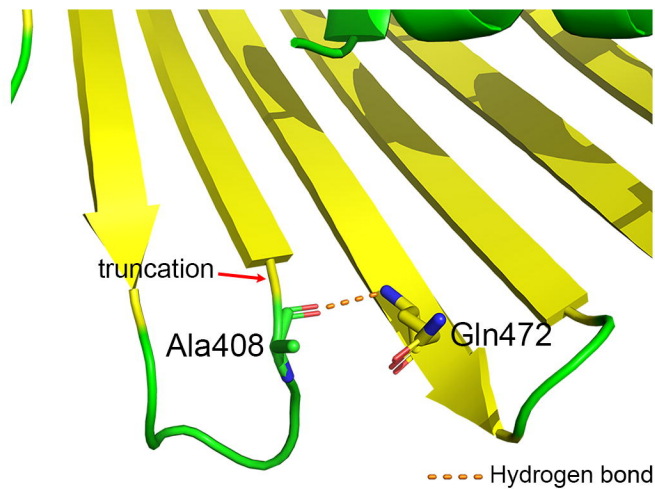



Iron replete

Iron deplete or host plant

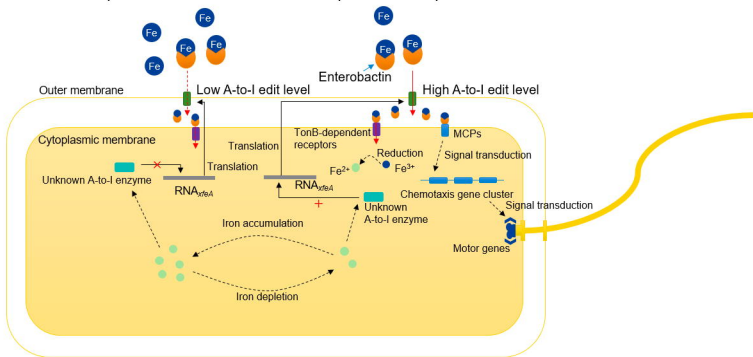

Source: https://www.biorxiv.org/content/10.1101/2020.12.03.409276v2.full.pdf
